# Supplementary material for: Notch signal strength controls cell fate in the haemogenic endothelium
Source: PubMed Central journal article supplement (PMC4634136; doi:10.1038/ncomms9510), 2015-10-14
Supplement: ncomms9510-s1.pdf [file ncomms9510-s1.pdf]

# SUPPLEMENTAL INFORMATION

Supplementary Figure 1

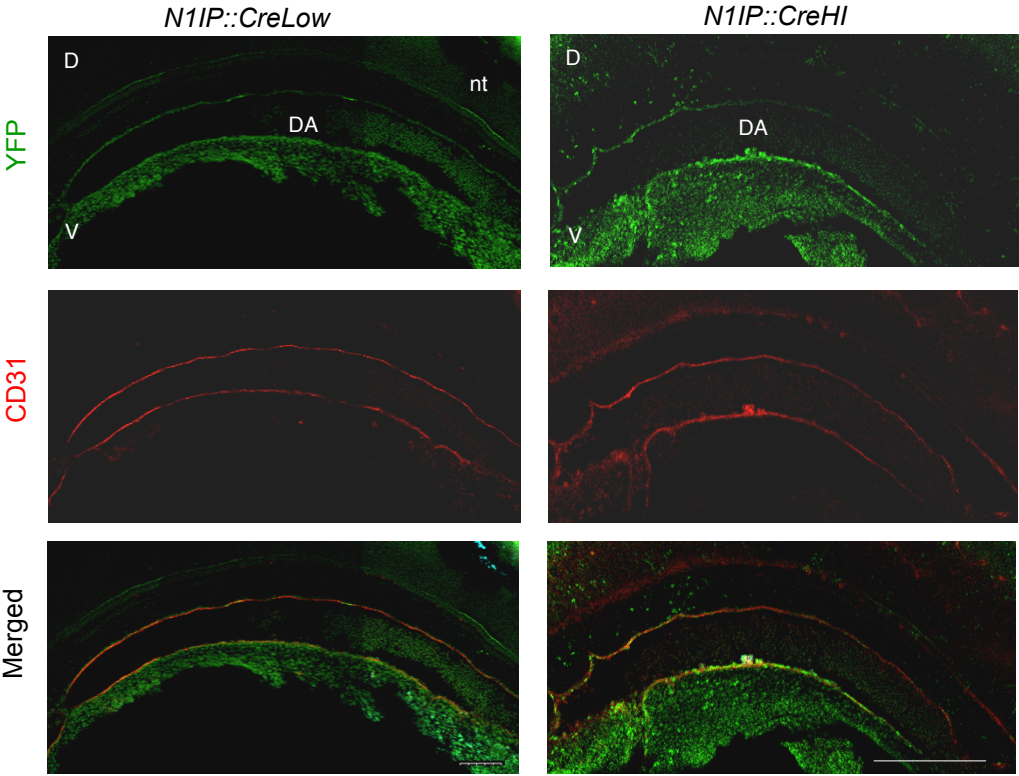

**Supplementary Figure 1: Endothelial YFP labeling of *N1IP::Cre<sup>HI</sup>* and *N1IP::Cre<sup>LO</sup>***  
Representative confocal images of the dorsal aorta from 3D whole-mount staining of E10.5 embryos. Staining for YFP (green) and CD31 (red). D, dorsal; V, ventral; DA, Dorsal Aorta, NT, Neural tube. Scale bars: 100µm for *N1IP::Cre<sup>LO</sup>* and 250µm for *N1IP::Cre<sup>HI</sup>*.

## Supplementary Figure 2

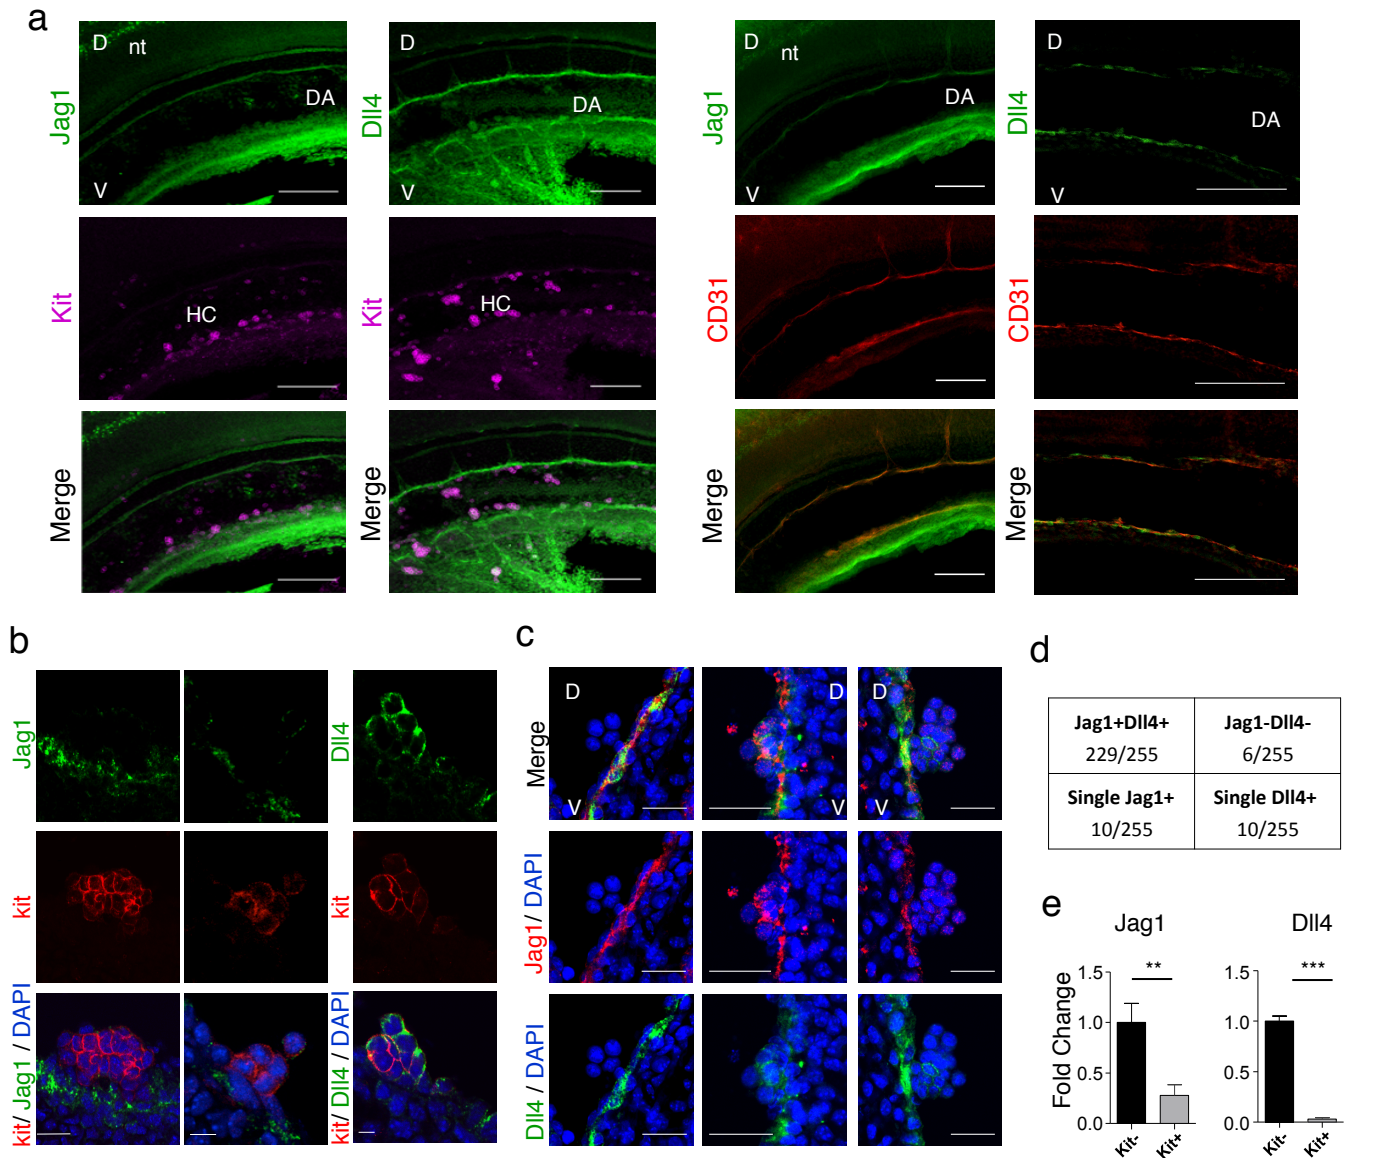

### Supplementary Figure 2 : Jag1 and Dll4 distribution on AGM,

a) Representative confocal images of E10.5 embryo. Jag1 or Dll4 (green) and Kit (magenta) in right panels or CD31 (red) in left panels. Scale bar: 100µm. DA, Dorsal Aorta, nt, neural tube; HC, Hematopoietic Cluster.

b) Detail of budding cluster-like structures from E10.5 embryo. Scale bar: 25µm (left panels), 10 µm (middle panels) and 75 µm (right panels).

c) Confocal images of budding cluster from E10.5 AGM embryo displaying different patterns of Jag1 (red) and Dll4 (green). Scale bar: 25µm. Nuclear staining with Dapi is shown in B-C. Dorso-ventral orientation in A (D, dorsal; V, ventral).

d) Cell counts of sorted  $CD31^{+}Kit^{-}CD45^{-}Ter119^{-}$  with Jag1 and/or Dll4 expression among 255-screened cells.

e) Relative expression of Jag1 and Dll4 mRNA on endothelial population (“Kit<sup>-</sup>”,  $CD31^{+}Kit^{-}CD45^{-}Ter119^{-}$ , black bars) and cluster-containing populations (“Kit<sup>+</sup>”,  $CD31^{+}Kit^{+}CD45^{-}Ter119^{-}$ , gray bars) from E11.5 embryos. The bars represent the average expression level of 12 replicates from 4 independent experiments, normalized to Kit<sup>-</sup> expression  $\pm$  SEM. Statistical significance was assessed by Student’s *t* test (\*\* $p \leq 0.01$ ; \*\*\* $p \leq 0.001$ ).

## Supplementary Figure 3

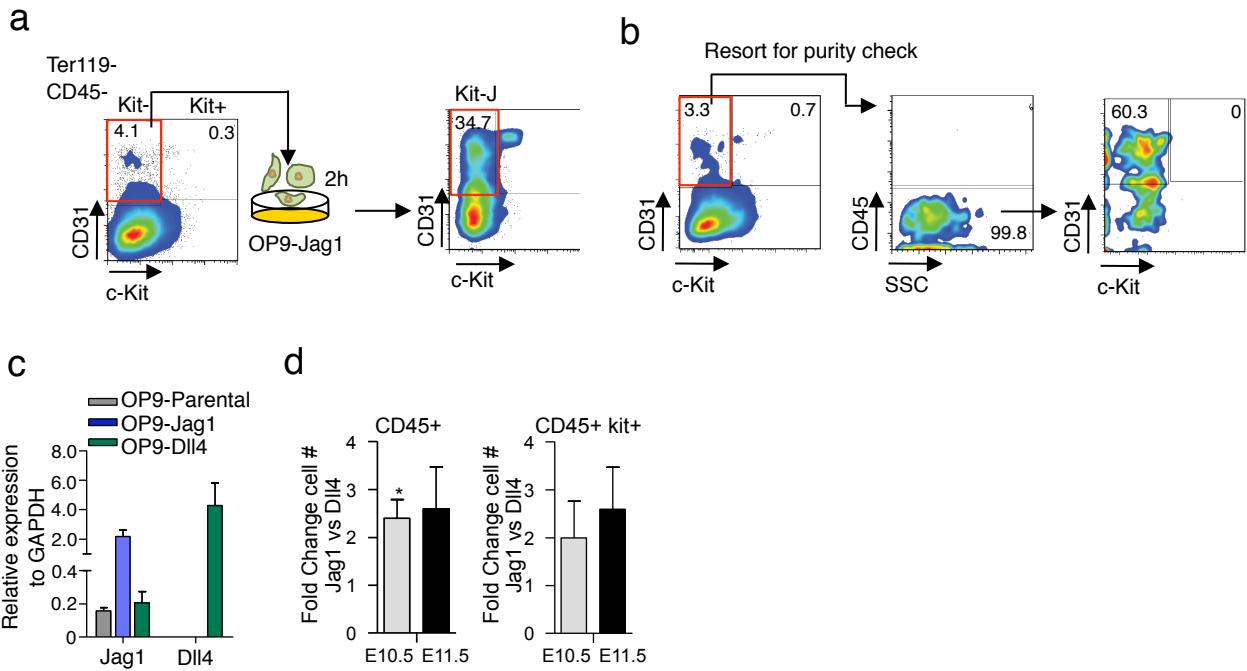

### Supplementary Figure 3: kit<sup>+</sup> and kit<sup>-</sup> incubation on OP9-Jag1 and OP9-Dll4

a) Gating strategy used to sort CD31<sup>+</sup>Kit<sup>-</sup>CD45<sup>-</sup>Ter119<sup>-</sup> endothelial population (Kit<sup>-</sup>). Upon 2 hours incubation on OP9-Jag1, CD31<sup>+</sup>CD45<sup>-</sup>Kit<sup>-</sup> cells were sorted (Kit-J).

b) Sorting purity associated with the gates used to isolate Kit<sup>-</sup> cells. The cells were sorted and immediately resorted. No contamination of CD45<sup>+</sup> cells is observed upon sorting. No Kit expressing cells contaminants are detected in the pool of Kit<sup>-</sup> sorted cells.

c) Relative expression levels of Jag1 and Dll4 transcripts in OP9-parental, OP9-Jag1 and OP9-Dll4 cell lines by qRT-PCR. Bars represent the mean  $\pm$ SEM determination from 4 experiments showing the fold change relative to GAPDH.

d) Quantification of CD45<sup>+</sup> or Kit<sup>+</sup>CD45<sup>+</sup> cells “de novo” generated upon culture on stromal cells. Bars represent the relative average fold change ( $\pm$  SEM) in the number of cells generated on OP9-Jag1 stroma compared to OP9-Dll4 culture conditions. For each developmental stage (E10.4 and E11.5), 4 or more samples of at least two independent experiments were considered. Student’s *t*-test was used to assess the significance (\*\* $p \leq 0.01$ ; \*\*\* $p \leq 0.001$ ).

## Supplementary Figure 4

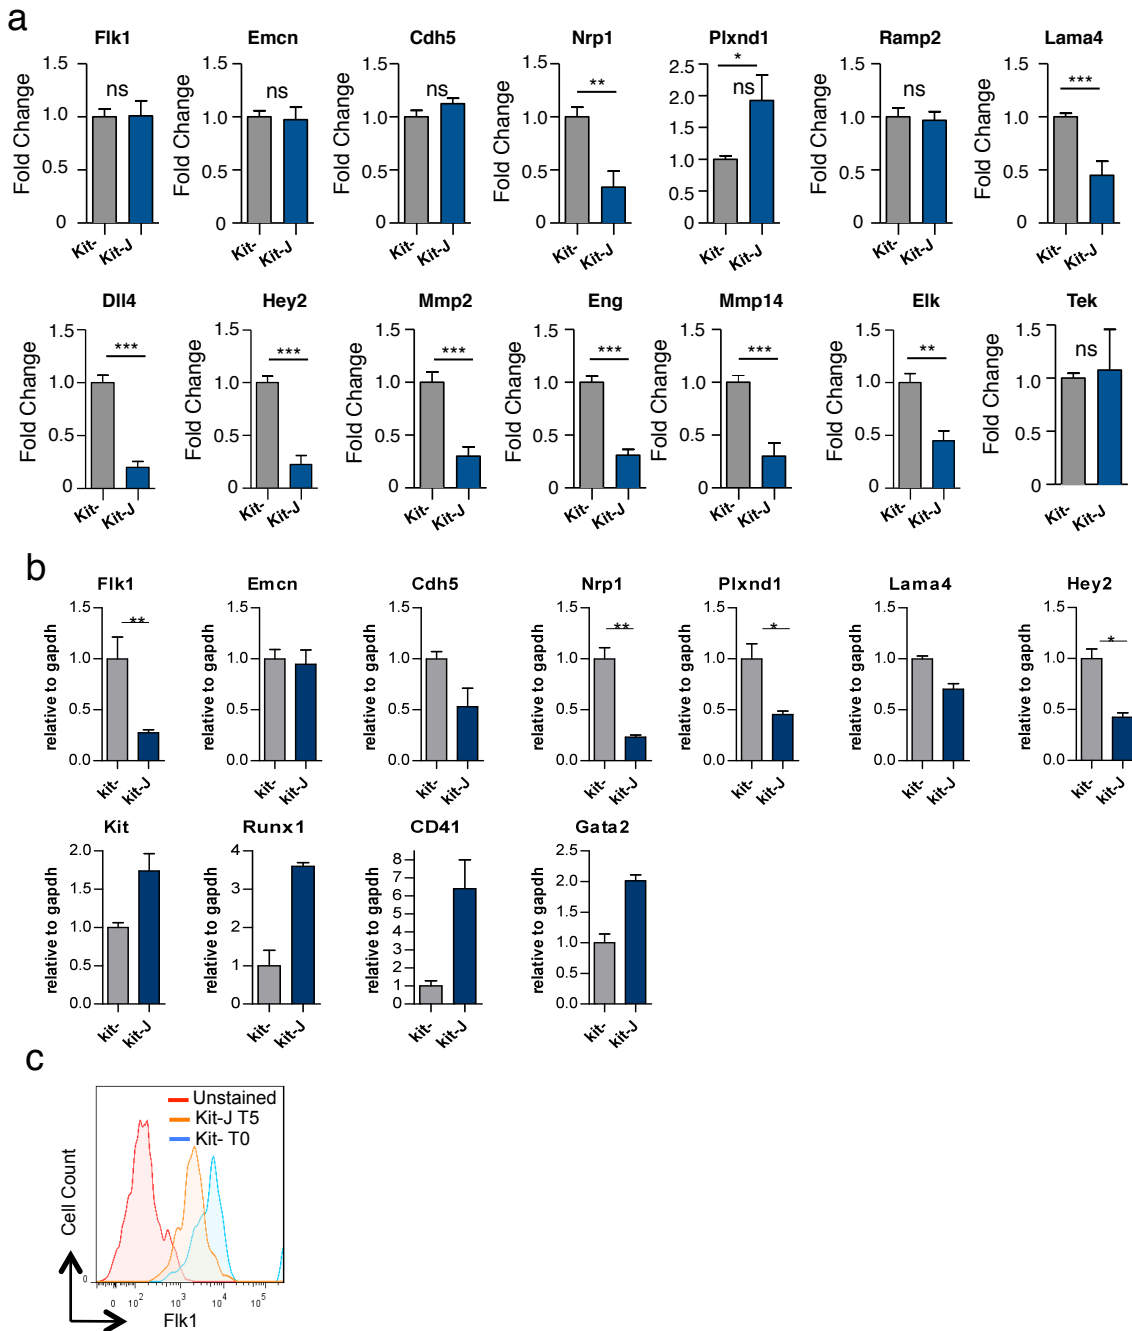

### Supplementary Figure 4: Decrease of endothelial and increase of hematopoietic genes by Jag1.

a) Expression levels of angiogenesis-related genes on E11.5 Kit<sup>-</sup> and Kit<sup>-</sup>J populations by qRT-PCR (2h incubation). The bars represent the average expression level of 6 to 9 replicates from 3 independent experiments, normalized to Kit<sup>-</sup> expression  $\pm$  SEM. Statistical significance was assessed by Student's *t* test \* $p \leq 0.05$ ; \*\* $p \leq 0.01$ ; \*\*\* $p \leq 0.001$ ; ns-not statistically significant).

b) Expression levels of genes on E11.5 Kit<sup>-</sup> and Kit<sup>-</sup>J populations by qRT-PCR (5h incubation). The bars represent the average expression levels ( $\pm$  SEM) from 3 independent experiments. Statistical significance was assessed by Student's *t* test \* $p \leq 0.05$ ; \*\* $p \leq 0.01$ ; not assigned if non-statistically significant.

c) Fluorescence intensity histogram representing the levels of Flk1 staining on sorted endothelial CD31<sup>+</sup>Kit<sup>-</sup>CD45<sup>-</sup>Ter119<sup>-</sup> cells at time 0 or after 5h incubation on OP9-Jag1.

## Supplementary Figure 5

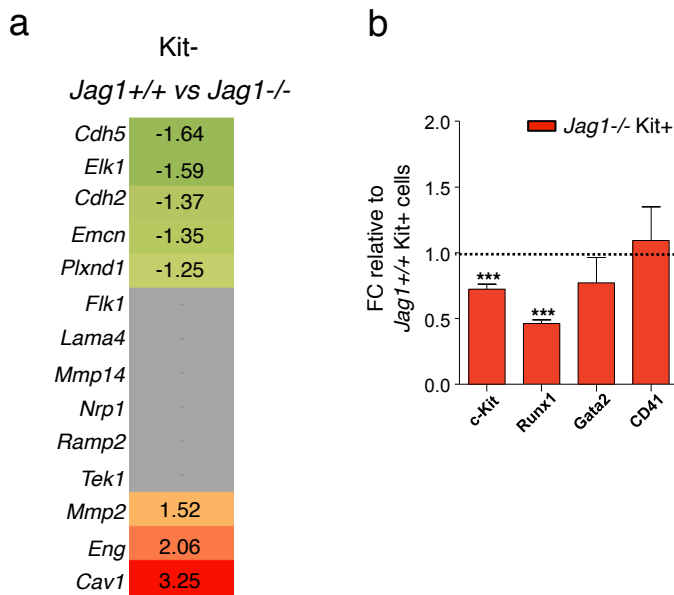

### Supplementary Figure 5. *Jag1* is required for silencing the endothelial program in Kit<sup>+</sup> cells

a) Fold change (FC) expression levels of a panel of angiogenesis-related genes detected in endothelial population (Kit<sup>-</sup>) of E10.5 *Jag1*<sup>+/+</sup> and *Jag1*<sup>-/-</sup> embryos. Cells from each genotype were obtained from 7 sorting experiments were pooled into two independent samples. Color grades reflect the FC values of each gene expression. All FC values represent statistically significant differences on gene expression ( $p < 0,05$ ). Genes that do not show a statistically significant alteration in pair-wise comparison are listed in gray.

b) Fold change expression levels by qRT-PCR of hematopoietic-related genes from E10.5 Kit<sup>+</sup> fractions from *Jag1*<sup>-/-</sup> embryos compared to wild-type littermates. The bars represent the average expression level of 4 to 6 replicates from 2 independent experiments  $\pm$ SEM. Statistical significance was assessed by Student's *t*-test (\*\*\*) $p \leq 0.001$ ; not assigned if not significant).

**Supplementary Table 1**

| <b>Gene Name</b> | <b>Forward Primer</b>           | <b>Reverse Primer</b>          |
|------------------|---------------------------------|--------------------------------|
| <i>Flk1</i>      | GGCTGGCATCACCATCAAAAAC          | AGGCACAGACACAACAGGGATAGC       |
| <i>Emcn</i>      | GCTACCAGGTTCCCAGAACA            | ATGCAGAGGATGTTGCAGTG           |
| <i>Cdh2</i>      | CATCAATGGCAATCAAGTGG            | CATACGTCCCAGGCTTTGAT           |
| <i>Cdh5</i>      | TGCATCCTCACCATCACAGT            | CAACTGCTCGTGAATCTCCA           |
| <i>Nrp1</i>      | GGAACCCAGTGGATGAGTGT            | ATGTCGGGAACCTCTGATTGG          |
| <i>Plxnd1</i>    | GTACCCTGGGCAGAGTGAAA            | TACTTTCTTGCGGTGGCTCT           |
| <i>Elk3</i>      | AATCTCTGCACCCCAACTGT            | AGTCCACTTGGTGTCTGTGC           |
| <i>Mmp14</i>     | TTGATGGTGAAGGAGGGTTC            | CAGCCACCAAGAAGATGTCA           |
| <i>Ramp2</i>     | CTGAGGACAGCCTTGTGTCAA           | GTCGCTGTAATGCCTGTAATC          |
| <i>Lama4</i>     | AGCCTCCTGCCTGATGTAGA            | GACAAGATGGGTTGCTTGGT           |
| <i>Eng</i>       | TTTGTACCCACAAGTCTCGCA           | GAGAACGTGGACTTCACGCA           |
| <i>Mmp2</i>      | CAGGGCACCTCCTACAACAG            | CAGTGGACATAGCGGTCTCG           |
| <i>Hey2</i>      | CCTTGTGAGGAAACGACCTC            | GTTGTGCGGTGAATTGGACCT          |
| <i>Tek</i>       | GTAAGCTCAGGTGCCACTGT            | GGCCTGCCTTCTTTCTCACA           |
| <i>Cav1</i>      | GCACACCAAGGAGATTGACC            | TCCCTTCTGGTCTGCAATC            |
| <i>Cyr61</i>     | TGCTGTAAGGTCTGCGCTAA            | AGGGTCTGCCTTCTGACTGA           |
| <i>Vegfc</i>     | GGGAAGAAGTTCACCATCA             | TTCCAATACGATGGGACACA           |
| <i>Dll4</i>      | ACCTTTGGCAATGTCTCCAC            | TTGGATGATGATTTGGCTGA           |
| <i>Col4a1</i>    | GGCCCTTCATTAGCAGGTGT            | GTGAGGACCAACCGTTAGGG           |
| <i>Fzd4</i>      | CCAGCTGCAGTTCTCCTTTG            | GGCCAGGCAAACCCAAATTC           |
| <i>Tcf7l2</i>    | GGGAAACCAACGAACACAGC            | GGCCGCACCAGTTATTCTGT           |
| <i>Tcf4</i>      | AGGTGCTCGGTGAATTTTCT            | GGCGAAAACATCGCACTGAAA          |
| <i>Meis2</i>     | CTCACACACCCGTACCCTTC            | TGGCTACTGCTCGATTTGA            |
| <i>Zeb1</i>      | GCTGGCAAGACAACGTGAAA            | GGGCGCCTCAGGATAAATGA           |
| <i>HoxD8</i>     | GAGGCCGAGCTGGTACAATA            | CAGGAGCTGCTTGTGGTCTC           |
| <i>Acvr1l</i>    | TGGTCACCACAGCTATCAGC            | CAAGTCTCCCCTGGTTAGGC           |
| <i>Itgb1</i>     | CGCATTGGCTTTGGCTCATT            | AATGGGCTGGTGCAGTTTTG           |
| <i>Egfl7</i>     | GAAGAAGGCTACCCCACTTACA          | TACACACTCTACGGCTGGGT           |
| <i>Lrp5</i>      | TTCCAACATGCTGGGTCAGG            | GCCCCTTCAATGCTATGCAG           |
| <i>Snai2</i>     | CACATTGCCTTGTGTCTGCAA           | AAGAGAAAGGCTTTTCCCAGT          |
| <i>Vwf</i>       | TGCTGCCCAGAGTATGAGTG            | CTTTCCTGCAGGCACAGGTA           |
| <i>Rhoc</i>      | GAAACAGGAGCCGTTTCGAT            | CCCGAGTGGCCATCTCAAAT           |
| <i>Anxa2</i>     | GGGTGAAGAGGAAAGGAACC            | TTGATGCTCTCCAGCATGTC           |
| <i>Flt1</i>      | CTGAAGCGGTCTTCTCCGA             | GTGCAAACCTCCACTTGCTG           |
| <i>Itga2</i>     | TGCGGCTGCTAATGCTAGTT            | CCAGTAGCCAGTTGCCTTGT           |
| <i>Sox18</i>     | CAAACCTGCCGACGAGTTGCG           | ACGCTTTGCCAGCATCTTG            |
| <i>Efnb2</i>     | CCAGGAATCACGGTCCAACA            | TGCTAGAACCTGGATTTGGCT          |
| <i>Ccnd1</i>     | GATGGCGATCGTCCTGTCTAT           | ACAGGCCGCTACAAGAAACA           |
| <i>Hes5</i>      | TGAAACACAGCAAAGCCTTC            | GTGCAGGGTCAGGAACTGTA           |
| <i>Itga2b</i>    | AGAGTGAAGGGCTGAGTCCA            | GCTCCATATGCTCCACAAT            |
| <i>Jag1</i>      | GACCAGAACGGCAACAAAACCTTGCATGGAA | TTGGTCTCACAGAGGCACTGCCAGGGTTCA |
| <i>Hes1</i>      | CGGCATTCCAAGCTAGAGAAGG          | GGTAGGTCATGGCGTTGATCTG         |
| <i>Gata2</i>     | ACACACCACCCGATACCCACC           | CCACAGGCGTTGCACACAGG           |
| <i>Runx1</i>     | CACTGCCTTTAACCCTCAGC            | GAGGTGATGGATCCCAGGTA           |
| <i>Kit</i>       | GGCTGGCATCACCATCAAAAAC          | AGGCACAGACACAACAGGGATAGC       |
| <i>Gapdh</i>     | TGTTCTACCCCAATGTGT              | TGTGAGGGAGATGCTCAGTG           |
| <i>Hprt</i>      | GTAAAGCAGTACAGCCCCAAA           | AGGGCATATCCAACAACAAACTT        |

**Supplementary Table 1.**List of mouse primers used for Pre Amplifications reactions and qRT-PCR

**Supplementary Table 2**

| GO Biological Processes in Kit+ _Kit- comparison              |                 |               |                 |      |                         |
|---------------------------------------------------------------|-----------------|---------------|-----------------|------|-------------------------|
| Name                                                          | Observed events | Expected mean | Expected stddev | N    | Corrected right P-Value |
| developmental process                                         | 171             | 48.6          | 6.90            | 2362 | <1.0e-16                |
| angiogenesis                                                  | 42              | 3.95          | 1.97            | 192  | <1.0e-16                |
| regulation of cell migration                                  | 43              | 4.96          | 2.20            | 241  | <1.0e-16                |
| cell adhesion                                                 | 62              | 12.3          | 3.47            | 599  | <1.0e-16                |
| organ development                                             | 66              | 15.3          | 3.87            | 745  | <1.0e-16                |
| cell differentiation                                          | 77              | 22.5          | 4.70            | 1095 | <1.0e-16                |
| heart development                                             | 32              | 3.97          | 1.97            | 193  | <1.0e-16                |
| regulation of cell proliferation                              | 57              | 14.3          | 3.74            | 694  | 6.11e-16                |
| positive regulation of cell migration                         | 28              | 3.43          | 1.83            | 167  | 2.72e-15                |
| regulation of cellular metabolic process                      | 71              | 22.3          | 4.68            | 1085 | 8.77e-15                |
| response to stimulus                                          | 205             | 110           | 10.4            | 5356 | 2.56e-14                |
| lymph vessel development                                      | 10              | 0.247         | 0.492           | 12   | 1.02e-13                |
| positive regulation of gene expression                        | 56              | 15.7          | 3.92            | 763  | 1.02e-13                |
| positive regulation of transcription, DNA-dependent           | 56              | 16.0          | 3.95            | 776  | 1.85e-13                |
| vasculogenesis                                                | 17              | 1.36          | 1.15            | 66   | 1.62e-12                |
| blood vessel morphogenesis                                    | 14              | 0.864         | 0.920           | 42   | 5.43e-12                |
| vascular endothelial growth factor receptor signaling pathway | 11              | 0.452         | 0.666           | 22   | 1.10e-11                |
| extracellular matrix organization                             | 20              | 2.37          | 1.52            | 115  | 2.14e-11                |
| cellular component movement                                   | 32              | 7.03          | 2.62            | 342  | 1.31e-10                |
| signal transduction                                           | 131             | 67.6          | 8.14            | 3286 | 1.72e-10                |
| cell motility                                                 | 31              | 6.79          | 2.58            | 330  | 2.47e-10                |
| tube morphogenesis                                            | 20              | 2.86          | 1.67            | 139  | 6.56e-10                |

|                                              |     |       |       |      |          |
|----------------------------------------------|-----|-------|-------|------|----------|
| blood vessel development                     | 16  | 1.73  | 1.30  | 84   | 8.98e-10 |
| branching morphogenesis of a tube            | 18  | 2.34  | 1.52  | 114  | 1.34e-09 |
| cellular response to stimulus                | 141 | 78.0  | 8.74  | 3792 | 2.71e-09 |
| morphogenesis of a branching structure       | 18  | 2.45  | 1.55  | 119  | 2.68e-09 |
| positive regulation of BMP signaling pathway | 10  | 0.555 | 0.737 | 27   | 3.95e-09 |
| semaphorin-plexin signaling pathway          | 8   | 0.288 | 0.531 | 14   | 4.03e-09 |
| cell-cell adhesion                           | 25  | 5.20  | 2.26  | 253  | 7.51e-09 |
| actin filament-based process                 | 22  | 4.26  | 2.04  | 207  | 2.03e-08 |
| cytoskeleton organization                    | 31  | 8.33  | 2.86  | 405  | 2.79e-08 |
| embryo development                           | 26  | 6.07  | 2.44  | 295  | 3.21e-08 |
| positive regulation of MAPK cascade          | 13  | 1.36  | 1.15  | 66   | 3.22e-08 |
| chemotaxis                                   | 23  | 4.83  | 2.18  | 235  | 3.79e-08 |
| axon guidance                                | 17  | 2.61  | 1.60  | 127  | 4.71e-08 |
| lymphangiogenesis                            | 7   | 0.267 | 0.512 | 13   | 8.48e-08 |

**Supplementary Table 2-** List of selected enriched GO Biological Processes in Kit<sup>+</sup>\_Kit<sup>-</sup> comparison. Terms sorted by corrected right p-value. p-value scale. Multiple test correction Benjamini Hochberg FDR.



**Supplementary Table 3**

| GO Biological Processes in Kit-J_Kit- comparison              |                 |               |                 |      |                         |
|---------------------------------------------------------------|-----------------|---------------|-----------------|------|-------------------------|
| Name                                                          | Observed events | Expected mean | Expected stddev | N    | Corrected right P-Value |
| developmental process                                         | 95              | 26.7          | 5.14            | 2362 | <1.0e-16                |
| angiogenesis                                                  | 26              | 2.17          | 1.47            | 192  | <1.0e-16                |
| regulation of cell migration                                  | 28              | 2.73          | 1.64            | 241  | <1.0e-16                |
| cell adhesion                                                 | 37              | 6.78          | 2.59            | 599  | 1.33e-13                |
| regulation of signal transduction                             | 42              | 10.5          | 3.22            | 924  | 2.87e-11                |
| regulation of cell proliferation                              | 37              | 7.86          | 2.79            | 694  | 7.93e-12                |
| regulation of metabolic process                               | 51              | 16.2          | 4.00            | 1432 | 5.78e-10                |
| anatomical structure formation involved in morphogenesis      | 22              | 3.23          | 1.79            | 285  | 6.62e-10                |
| organ development                                             | 35              | 8.43          | 2.89            | 745  | 7.81e-10                |
| cell differentiation                                          | 43              | 12.4          | 3.50            | 1095 | 1.05e-09                |
| response to external stimulus                                 | 24              | 4.08          | 2.01            | 360  | 1.30e-09                |
| vasculogenesis                                                | 12              | 0.747         | 0.860           | 66   | 1.71e-09                |
| lymph vessel development                                      | 7               | 0.136         | 0.366           | 12   | 2.34e-09                |
| blood vessel morphogenesis                                    | 10              | 0.476         | 0.686           | 42   | 4.32e-09                |
| vascular endothelial growth factor receptor signaling pathway | 8               | 0.249         | 0.496           | 22   | 7.74e-09                |
| response to stimulus                                          | 116             | 60.6          | 7.74            | 5356 | 1.26e-08                |

|                                                      |    |       |       |     |          |
|------------------------------------------------------|----|-------|-------|-----|----------|
| morphogenesis of a branching structure               | 14 | 1.35  | 1.15  | 119 | 1.10e-08 |
| positive regulation of MAPK cascade                  | 11 | 0.747 | 0.860 | 66  | 2.10e-08 |
| cellular component movement                          | 21 | 3.87  | 1.96  | 342 | 5.76e-08 |
| branching morphogenesis of a tube                    | 13 | 1.29  | 1.13  | 114 | 5.81e-08 |
| tube morphogenesis                                   | 14 | 1.57  | 1.25  | 139 | 6.66e-08 |
| heart development                                    | 16 | 2.19  | 1.47  | 193 | 7.50e-08 |
| cell motility                                        | 20 | 3.74  | 1.92  | 330 | 1.60e-07 |
| actin filament-based process                         | 16 | 2.34  | 1.52  | 207 | 1.85e-07 |
| response to vitamin                                  | 13 | 1.45  | 1.20  | 128 | 2.01e-07 |
| blood vessel development                             | 11 | 0.951 | 0.970 | 84  | 2.06e-07 |
| response to mechanical stimulus                      | 11 | 0.962 | 0.975 | 85  | 2.28e-07 |
| positive regulation of cellular biosynthetic process | 31 | 8.86  | 2.96  | 783 | 2.39e-07 |
| semaphorin-plexin signaling pathway                  | 6  | 0.159 | 0.396 | 14  | 3.29e-07 |
| extracellular matrix organization                    | 12 | 1.30  | 1.13  | 115 | 5.01e-07 |
| regulation of endothelial cell proliferation         | 8  | 0.532 | 0.725 | 47  | 2.58e-06 |
| response to extracellular stimulus                   | 17 | 3.31  | 1.81  | 292 | 2.75e-06 |

**Supplementary Table 3**, - List of selected enriched GO Biological Processes in Kit-J\_Kit- comparison. Terms sorted by corrected right p-value. p-value scale. Multiple test correction Benjamini Hochberg FDR.
